# Supplementary material
Source: PubMed Central journal article supplement (PMC9896403)
Supplement: EIJ-D-21-00464_Waldschmidt_SD.pdf [file EIJ-D-21-00464_Waldschmidt_SD.pdf]

## Supplementary data

Supplementary Table 1. Detailed patient characteristics.

|                                                                                                                                                                                                                                                                                                                                                                                                                                                                                                                                                                                                                                                                                                                                                                                                                               | Without <sup>1</sup> LVOT<br>calcification (n=358) | With <sup>2</sup> LVOT<br>calcification (n=358) | <i>p</i> -value |
|-------------------------------------------------------------------------------------------------------------------------------------------------------------------------------------------------------------------------------------------------------------------------------------------------------------------------------------------------------------------------------------------------------------------------------------------------------------------------------------------------------------------------------------------------------------------------------------------------------------------------------------------------------------------------------------------------------------------------------------------------------------------------------------------------------------------------------|----------------------------------------------------|-------------------------------------------------|-----------------|
| <b>MSCT baseline parameters regarding location of calcification in LVOT</b>                                                                                                                                                                                                                                                                                                                                                                                                                                                                                                                                                                                                                                                                                                                                                   |                                                    |                                                 |                 |
| Calcium volume LVOT total, mm <sup>3</sup>                                                                                                                                                                                                                                                                                                                                                                                                                                                                                                                                                                                                                                                                                                                                                                                    | 0 (0.0, 0.6)                                       | 49.1 (21.8, 97.1)                               | <0.001          |
| Calcium volume LCC, mm <sup>3</sup>                                                                                                                                                                                                                                                                                                                                                                                                                                                                                                                                                                                                                                                                                                                                                                                           | 0 (0.0, 0.0)                                       | 14.7 (1.6, 48.9)                                | <0.001          |
| Calcium volume NCC, mm <sup>3</sup>                                                                                                                                                                                                                                                                                                                                                                                                                                                                                                                                                                                                                                                                                                                                                                                           | 0 (0.0, 0.0)                                       | 10.6 (0, 41.3)                                  | <0.001          |
| Calcium volume RCC, mm <sup>3</sup>                                                                                                                                                                                                                                                                                                                                                                                                                                                                                                                                                                                                                                                                                                                                                                                           | 0 (0.0, 0.0)                                       | 0 (0, 7.9)                                      | <0.001          |
| Maximum calcium volume under LCC                                                                                                                                                                                                                                                                                                                                                                                                                                                                                                                                                                                                                                                                                                                                                                                              | -                                                  | 177 (49.4)                                      | -               |
| Maximum calcium volume under NCC                                                                                                                                                                                                                                                                                                                                                                                                                                                                                                                                                                                                                                                                                                                                                                                              | -                                                  | 40 (11.1)                                       | -               |
| Maximum calcium volume under RCC                                                                                                                                                                                                                                                                                                                                                                                                                                                                                                                                                                                                                                                                                                                                                                                              | -                                                  | 141 (39.4)                                      | -               |
| Okuno mild <sup>3</sup>                                                                                                                                                                                                                                                                                                                                                                                                                                                                                                                                                                                                                                                                                                                                                                                                       | -                                                  | 10 (11.6)                                       | -               |
| Okuno moderate <sup>4</sup>                                                                                                                                                                                                                                                                                                                                                                                                                                                                                                                                                                                                                                                                                                                                                                                                   | -                                                  | 54 (62.8)                                       | -               |
| Okuno severe <sup>5</sup>                                                                                                                                                                                                                                                                                                                                                                                                                                                                                                                                                                                                                                                                                                                                                                                                     | -                                                  | 22 (25.6)                                       | -               |
| <b>Outcome and mortality</b>                                                                                                                                                                                                                                                                                                                                                                                                                                                                                                                                                                                                                                                                                                                                                                                                  |                                                    |                                                 |                 |
| Stroke timepoint, d                                                                                                                                                                                                                                                                                                                                                                                                                                                                                                                                                                                                                                                                                                                                                                                                           | 2.9±2.6                                            | 2.7±4.3                                         | 0.91            |
| Stroke <48 hrs                                                                                                                                                                                                                                                                                                                                                                                                                                                                                                                                                                                                                                                                                                                                                                                                                | 5 (55.6)                                           | 14 (66.7)                                       | 0.87            |
| Stroke >48 hrs                                                                                                                                                                                                                                                                                                                                                                                                                                                                                                                                                                                                                                                                                                                                                                                                                | 4 (44.4)                                           | 7 (33.3)                                        | 0.87            |
| 30-day mortality                                                                                                                                                                                                                                                                                                                                                                                                                                                                                                                                                                                                                                                                                                                                                                                                              | 10 (2.8)                                           | 22 (6.1)                                        | 0.05            |
| 1-year mortality                                                                                                                                                                                                                                                                                                                                                                                                                                                                                                                                                                                                                                                                                                                                                                                                              | 33 (9.2)                                           | 60 (16.8)                                       | 0.004           |
| Mortality during whole follow-up                                                                                                                                                                                                                                                                                                                                                                                                                                                                                                                                                                                                                                                                                                                                                                                              | 58 (16.2)                                          | 83 (23.2)                                       | 0.02            |
| Follow-up period, yrs                                                                                                                                                                                                                                                                                                                                                                                                                                                                                                                                                                                                                                                                                                                                                                                                         | 1.03 (0.94, 1.13)                                  | 1.02 (0.91, 1.10)                               | -               |
| <p><sup>1</sup> Without ≤10 mm<sup>3</sup> LVOT calcium volume. <sup>2</sup> With &gt;10 mm<sup>3</sup> LVOT calcium volume.<br/> <sup>3</sup> Okuno et al [11], mild: 1 nodule of calcification extending &lt;5 mm in any dimension and covering &lt;10% of the perimeter of the LVOT; <sup>4</sup> Okuno moderate: 2 nodules of calcification or 1 extending &gt;5 mm in any direction or covering &gt;10% of the perimeter of the LVOT; <sup>5</sup> Okuno severe: multiple nodules of calcification of single focus extending &gt;10 mm in length or covering &gt;20% of the perimeter of the LVOT.</p> <p>Values are mean±SD, n (%) unless otherwise indicated or median (interquartile range).<br/> LCC: left coronary cusp; MSCT: multislice computed tomography; NCC: non-coronary cusp; RCC: right coronary cusp</p> |                                                    |                                                 |                 |

**Supplementary Table 2. Categorisation of LVOT calcification: subgroup analyses of patients with LVOT calcium volume >10 mm<sup>3</sup>.**

| <b>All-cause mortality and stroke</b>            |                                         |                                    |                 |
|--------------------------------------------------|-----------------------------------------|------------------------------------|-----------------|
|                                                  | Patients alive and no stroke<br>(n=320) | Patients dead or stroke<br>(n=38)  | <i>p</i> -value |
| <b>Quantitative calcium scoring by MSCT</b>      |                                         |                                    |                 |
| <b>Calcium volume LVOT total, mm<sup>3</sup></b> | 47.9 (21.4, 96.6)                       | 54.2 (33.4, 109.4)                 | 0.30            |
| <b>Calcium volume LCC, mm<sup>3</sup></b>        | 14.0 (1.6, 47.6)                        | 24.5 (3.0, 60.8)                   | 0.39            |
| <b>Calcium volume NCC, mm<sup>3</sup></b>        | 9.7 (0, 39.6)                           | 23.3 (0, 48.5)                     | 0.33            |
| <b>Calcium volume RCC, mm<sup>3</sup></b>        | 0 (0, 8.3)                              | 0 (0, 2.5)                         | 0.33            |
|                                                  | Patients alive and no stroke<br>(n= 75) | Patients dead or stroke<br>(n= 11) | <i>p</i> -value |
| <b>Classification by Okuno et al<sup>1</sup></b> |                                         |                                    |                 |
| <b>Mild<sup>2</sup></b>                          | 9 (12.0)                                | 1 (9.1)                            | 1.00            |
| <b>Moderate<sup>3</sup></b>                      | 46 (61.3)                               | 8 (72.7)                           | 0.69            |
| <b>Severe<sup>4</sup></b>                        | 20 (26.7)                               | 2 (18.2)                           | 0.82            |
| <b>Macroscopic aspects</b>                       |                                         |                                    |                 |
| <b>Coverage of perimeter of LVOT (%)</b>         | 9.0 (6.5, 17.7)                         | 12.1 (10.1, 16.1)                  | 0.23            |
| <b>Number of nodules</b>                         | 1 (1.0, 2.0)                            | 2.0 (1.0, 2.0)                     | 0.21            |
| <b>Nodule length, mm</b>                         | 6.3 (3.8, 9.9)                          | 3.1 (2.4, 8.8)                     | 0.11            |
| <b>Intraluminal protrusion of nodule, mm</b>     | 2.5 (1.9, 3.3)                          | 2.5 (1.8, 3.1)                     | 0.72            |
| <b>VARC-3 early safety<sup>5</sup></b>           |                                         |                                    |                 |
|                                                  | Endpoint reached<br>(n=245)             | Endpoint not reached<br>(n=110)    | <i>p</i> -value |
| <b>Quantitative calcium scoring by MSCT</b>      |                                         |                                    |                 |
| <b>Calcium volume LVOT total, mm<sup>3</sup></b> | 47.0 (20.9, 97.0)                       | 54.0 (23.9, 97.9)                  | 0.58            |
| <b>Calcium volume LCC, mm<sup>3</sup></b>        | 15.0 (1.9, 47.5)                        | 13.0 (1.0, 52.8)                   | 0.71            |
| <b>Calcium volume NCC, mm<sup>3</sup></b>        | 9.0 (0.0, 34.4)                         | 16.1 (0, 49.1)                     | 0.27            |
| <b>Calcium volume RCC, mm<sup>3</sup></b>        | 0 (0.0, 10.0)                           | 0 (0, 2.4)                         | 0.08            |
|                                                  | Endpoint reached<br>(n=60)              | Endpoint not reached<br>(n=24)     | <i>p</i> -value |
| <b>Classification by Okuno et al<sup>1</sup></b> |                                         |                                    |                 |

|                                                                                                                                                                                                                                                                                                                                                                                                                                                                                                                                                                                                                                                                                                                                                                                                                                                  |                          |                             |                 |
|--------------------------------------------------------------------------------------------------------------------------------------------------------------------------------------------------------------------------------------------------------------------------------------------------------------------------------------------------------------------------------------------------------------------------------------------------------------------------------------------------------------------------------------------------------------------------------------------------------------------------------------------------------------------------------------------------------------------------------------------------------------------------------------------------------------------------------------------------|--------------------------|-----------------------------|-----------------|
| <b>Mild<sup>2</sup></b>                                                                                                                                                                                                                                                                                                                                                                                                                                                                                                                                                                                                                                                                                                                                                                                                                          | 6 (10.0)                 | 3 (12.5)                    | 1.00            |
| <b>Moderate<sup>3</sup></b>                                                                                                                                                                                                                                                                                                                                                                                                                                                                                                                                                                                                                                                                                                                                                                                                                      | 36 (60.0)                | 17 (70.4)                   | 0.50            |
| <b>Severe<sup>4</sup></b>                                                                                                                                                                                                                                                                                                                                                                                                                                                                                                                                                                                                                                                                                                                                                                                                                        | 18 (30.0)                | 4 (16.7)                    | 0.33            |
| <b>Macroscopic aspects</b>                                                                                                                                                                                                                                                                                                                                                                                                                                                                                                                                                                                                                                                                                                                                                                                                                       |                          |                             |                 |
| <b>Coverage of perimeter of LVOT, %</b>                                                                                                                                                                                                                                                                                                                                                                                                                                                                                                                                                                                                                                                                                                                                                                                                          | 10.8 (6.7, 18.7)         | 10.6 (6.8, 14.3)            | 0.91            |
| <b>Number of nodules</b>                                                                                                                                                                                                                                                                                                                                                                                                                                                                                                                                                                                                                                                                                                                                                                                                                         | 1 (1.0, 2.0)             | 1 (1.0, 2.0)                | 0.44            |
| <b>Nodule length, mm</b>                                                                                                                                                                                                                                                                                                                                                                                                                                                                                                                                                                                                                                                                                                                                                                                                                         | 6.5 (4.0, 10.1)          | 5.3 (2.4, 9.1)              | 0.15            |
| <b>Intraluminal protrusion of nodule, mm</b>                                                                                                                                                                                                                                                                                                                                                                                                                                                                                                                                                                                                                                                                                                                                                                                                     | 2.5 (2.0, 3.3)           | 2.8 (1.8, 3.6)              | 0.55            |
| <b>VARC-3 device success<sup>6</sup></b>                                                                                                                                                                                                                                                                                                                                                                                                                                                                                                                                                                                                                                                                                                                                                                                                         |                          |                             |                 |
|                                                                                                                                                                                                                                                                                                                                                                                                                                                                                                                                                                                                                                                                                                                                                                                                                                                  | Endpoint reached (n=251) | Endpoint not reached (n=92) | <i>p</i> -value |
| <b>Quantitative calcium scoring by MSCT</b>                                                                                                                                                                                                                                                                                                                                                                                                                                                                                                                                                                                                                                                                                                                                                                                                      |                          |                             |                 |
| <b>Calcium volume LVOT total, mm<sup>3</sup></b>                                                                                                                                                                                                                                                                                                                                                                                                                                                                                                                                                                                                                                                                                                                                                                                                 | 44.9 (20.3, 88.1)        | 67.4 (31.7, 117.1)          | <0.01           |
| <b>Calcium volume LCC, mm<sup>3</sup></b>                                                                                                                                                                                                                                                                                                                                                                                                                                                                                                                                                                                                                                                                                                                                                                                                        | 14.5 (1.8, 47.4)         | 13.0 (1.2, 59.4)            | 0.77            |
| <b>Calcium volume NCC, mm<sup>3</sup></b>                                                                                                                                                                                                                                                                                                                                                                                                                                                                                                                                                                                                                                                                                                                                                                                                        | 5.7 (0, 32.5)            | 23.1 (1.1, 54.6)            | <0.01           |
| <b>Calcium volume RCC, mm<sup>3</sup></b>                                                                                                                                                                                                                                                                                                                                                                                                                                                                                                                                                                                                                                                                                                                                                                                                        | 0 (0, 4.5)               | 0 (0, 10.0)                 | 0.13            |
|                                                                                                                                                                                                                                                                                                                                                                                                                                                                                                                                                                                                                                                                                                                                                                                                                                                  | Endpoint reached (n=61)  | Endpoint not reached (n=18) | <i>p</i> -value |
| <b>Classification by Okuno et al<sup>1</sup></b>                                                                                                                                                                                                                                                                                                                                                                                                                                                                                                                                                                                                                                                                                                                                                                                                 |                          |                             |                 |
| <b>Mild<sup>2</sup></b>                                                                                                                                                                                                                                                                                                                                                                                                                                                                                                                                                                                                                                                                                                                                                                                                                          | 7 (11.5)                 | 2 (11.1)                    | 1.00            |
| <b>Moderate<sup>3</sup></b>                                                                                                                                                                                                                                                                                                                                                                                                                                                                                                                                                                                                                                                                                                                                                                                                                      | 38 (62.3)                | 11 (61.1)                   | 1.00            |
| <b>Severe<sup>4</sup></b>                                                                                                                                                                                                                                                                                                                                                                                                                                                                                                                                                                                                                                                                                                                                                                                                                        | 16 (26.2)                | 5 (27.8)                    | 1.00            |
| <b>Macroscopic aspects</b>                                                                                                                                                                                                                                                                                                                                                                                                                                                                                                                                                                                                                                                                                                                                                                                                                       |                          |                             |                 |
| <b>Coverage of perimeter of LVOT, %</b>                                                                                                                                                                                                                                                                                                                                                                                                                                                                                                                                                                                                                                                                                                                                                                                                          | 10.3 (6.6, 17.6)         | 11.4 (7.3, 21.1)            | 0.45            |
| <b>Number of nodules</b>                                                                                                                                                                                                                                                                                                                                                                                                                                                                                                                                                                                                                                                                                                                                                                                                                         | 1.0 (1.0, 2.0)           | 1.0 (1.0, 2.0)              | 0.68            |
| <b>Nodule length, mm</b>                                                                                                                                                                                                                                                                                                                                                                                                                                                                                                                                                                                                                                                                                                                                                                                                                         | 6.3 (3.7, 10.4)          | 6.9 (2.5, 9.9)              | 0.67            |
| <b>Intraluminal protrusion of nodule, mm</b>                                                                                                                                                                                                                                                                                                                                                                                                                                                                                                                                                                                                                                                                                                                                                                                                     | 2.5 (1.9, 3.3)           | 2.5 (1.9, 2.8)              | 0.58            |
| <sup>1</sup> Okuno et al [11]. <sup>2</sup> mild: 1 nodule of calcification extending <5 mm in any dimension and covering <10% of the perimeter of the LVOT. <sup>3</sup> moderate: 2 nodules of calcification or 1 extending >5 mm in any direction or covering >10% of the perimeter of the LVOT. <sup>4</sup> severe: multiple nodules of calcification of single focus extending >10 mm in length or covering >20% of the perimeter of the LVOT. <sup>5</sup> VARC-3 early safety endpoint after 30 days (positive endpoint, see Methods). <sup>6</sup> VARC-3 device success endpoint after 30 days (positive endpoint, see Methods). Values are mean±SD, n (%) unless otherwise indicated or median (interquartile range). LCC: left coronary cusp; MSCT: multislice computed tomography; NCC: non-coronary cusp; RCC: right coronary cusp |                          |                             |                 |
